# Supplementary material for: The influence of protonation on the structure and spectral properties of porphine: UV-vis, 1H NMR and ab initio studies
Source: Royal Society of Chemistry journal article supplement (doi:10.1039/c6ra12520d), 2016-01-01
Supplement: c6ra12520d1.pdf [file c6ra12520d1.pdf]

## Supporting information for

### The influence of protonation on the structure and spectral properties of porphine: UV-vis, $^1\text{H}$ NMR and ab initio studies

Saeed Zakavi,<sup>\*,a</sup> Reza Omidyan,<sup>\*,b</sup> Sadegh Talebzadeh

<sup>a</sup> Department of Chemistry, Institute for Advanced Studies in Basic Sciences (IASBS), Zanjan 45137-66731, Iran. E-mail: zakavi@iasbs.ac.ir.

<sup>b</sup> Department of Chemistry, University of Isfahan, 81746-73441 Isfahan, Iran.

Figure S1.  $^1\text{H}$  NMR of  $\text{H}_2\text{P}$  in  $\text{CDCl}_3$ .

Figure S2.  $^1\text{H}$  NMR of  $\text{H}_2\text{P}(\text{HCOOH})_2$  in  $\text{CDCl}_3$ . The signals at  $\delta$  8.0 and 10.5 ppm are due to formic acid.

Figure S3.  $^1\text{H}$  NMR of  $\text{H}_2\text{P}(\text{HCOOH})_2$  in  $\text{CDCl}_3$  in aromatic region (see Figure S2 [16] for  $^1\text{H}$  NMR spectrum of formic acid).

Figure S4.  $^1\text{H}$  NMR spectrum of  $\text{H}_2\text{P}(\text{CF}_3\text{COOH})_2$  in  $\text{D}_2\text{O}$ .

Figure S5.  $^1\text{H}$  NMR of  $\text{CF}_3\text{COOH}$  in  $\text{CDCl}_3$ .

Figure S6.  $^1\text{H}$  NMR of  $\text{H}_2\text{T}(\text{tert-Bu})\text{P}$  in  $\text{CDCl}_3$ .

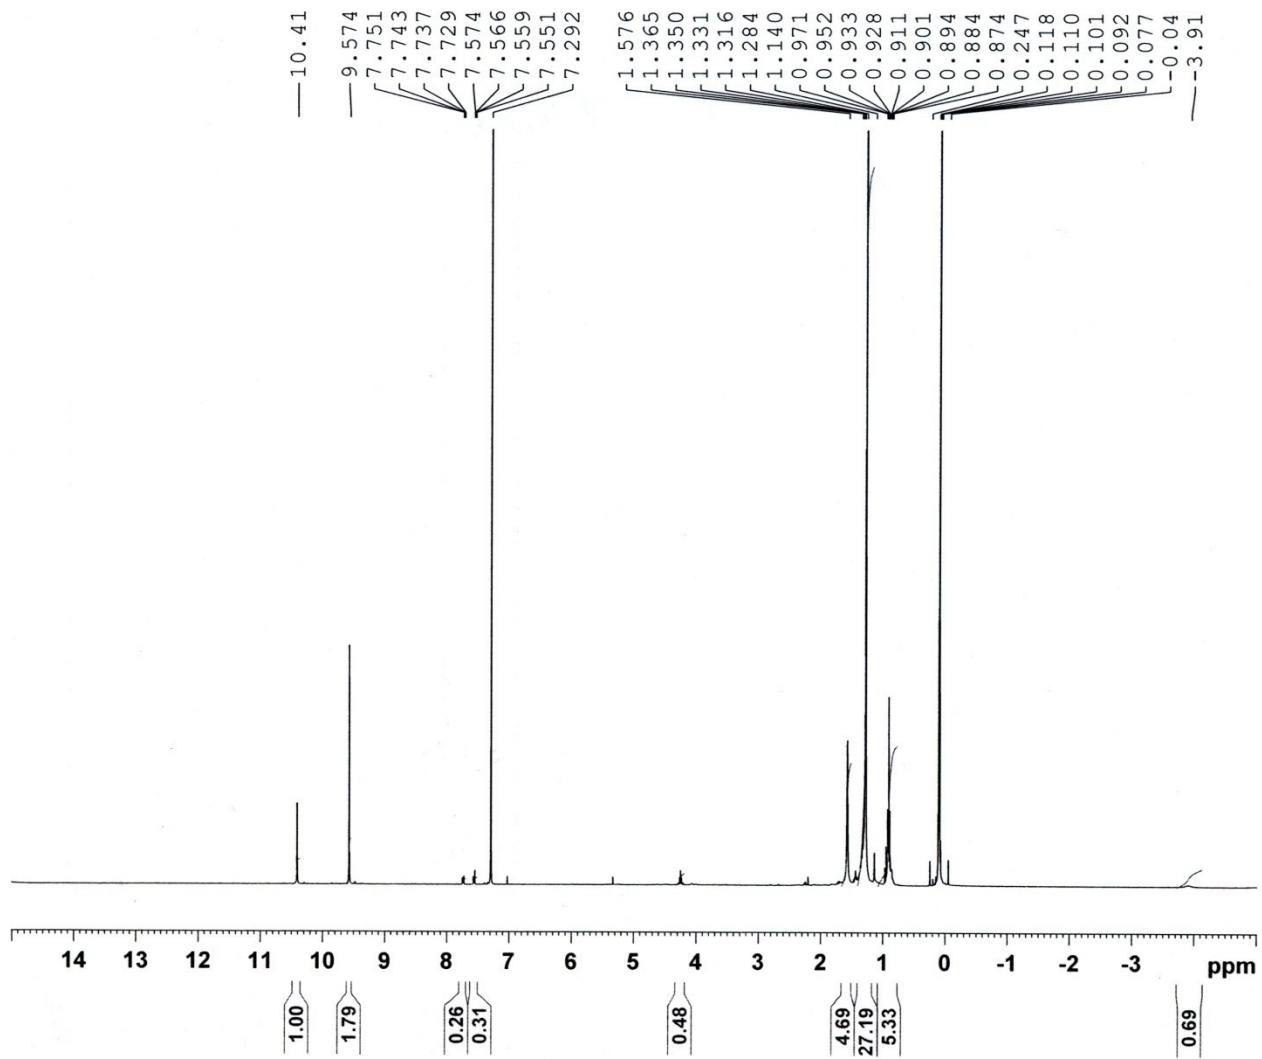

Figure S1.  $^1\text{H}$  NMR of  $\text{H}_2\text{P}$  in  $\text{CDCl}_3$ .

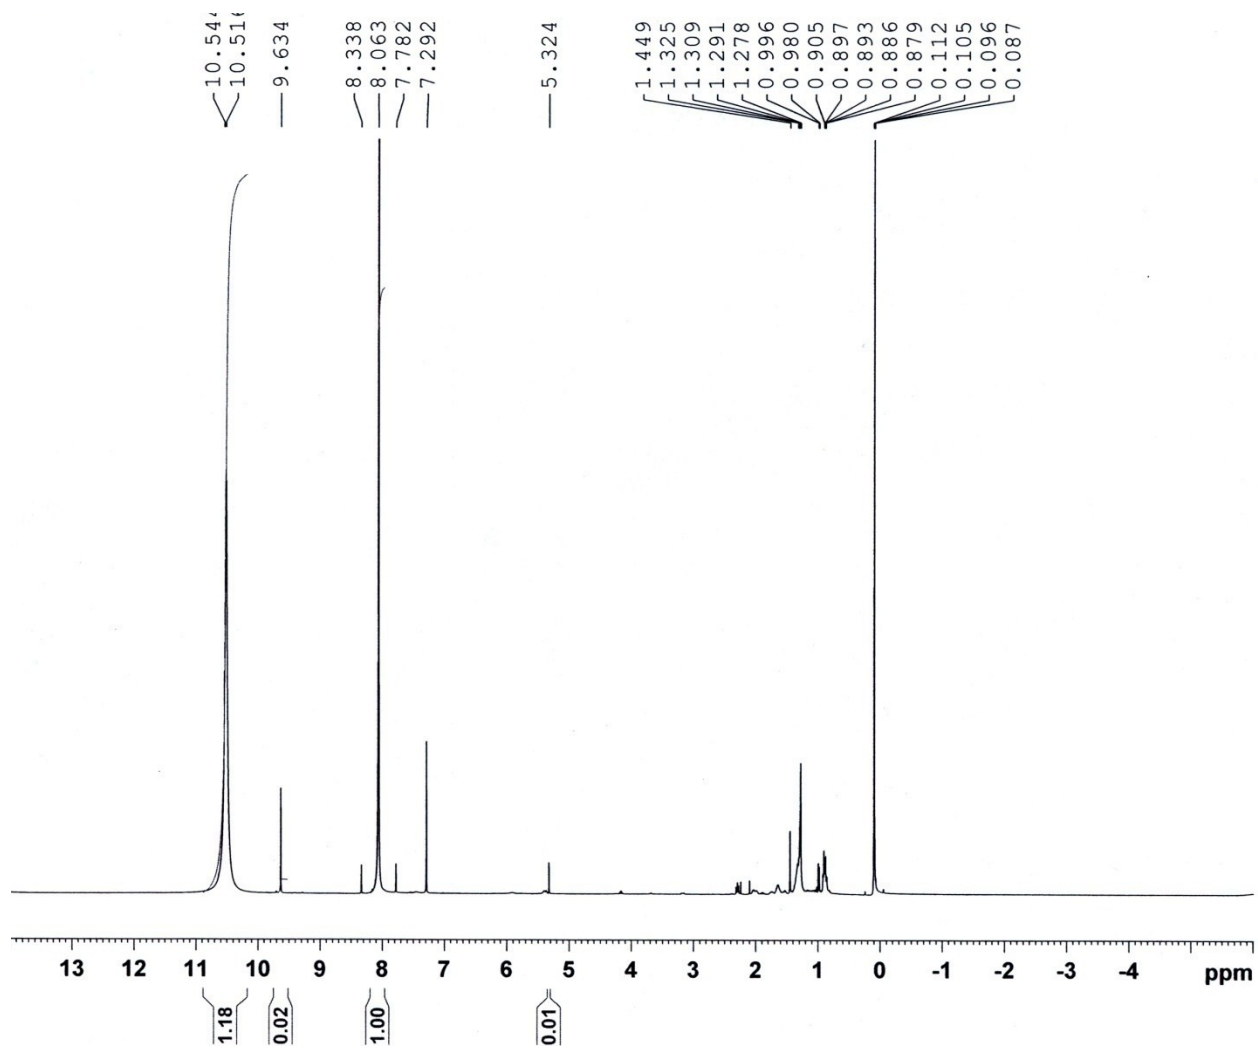

Figure S2.  $^1\text{H}$  NMR of  $\text{H}_2\text{P}(\text{HCOOH})_2$  in  $\text{CDCl}_3$ . The signals at  $\delta$  8.0 and 10.5 ppm are due to formic acid.

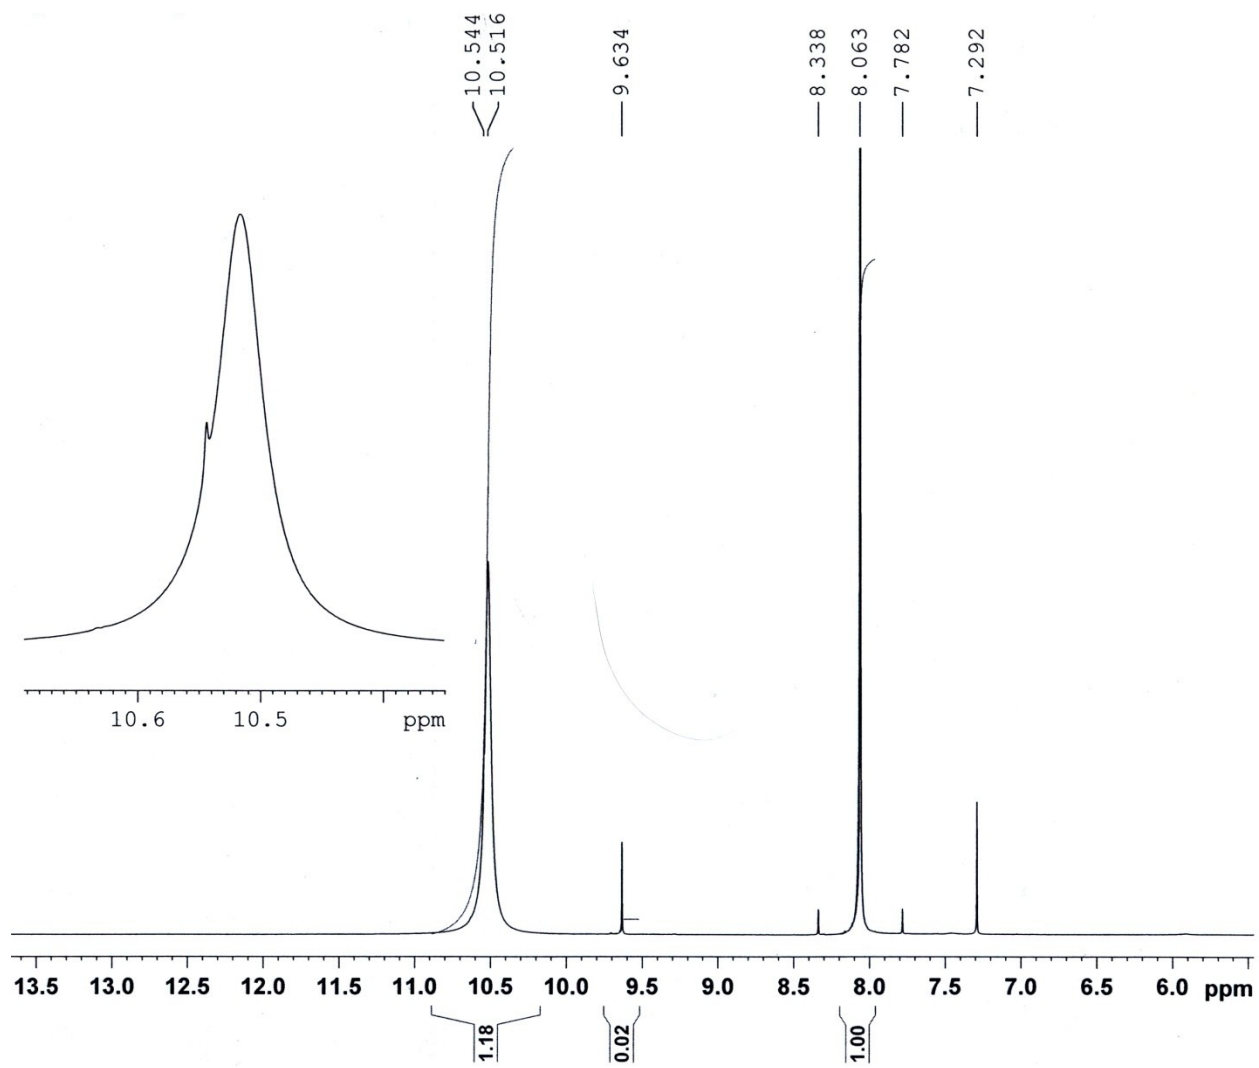

Figure S3.  $^1\text{H}$  NMR of  $\text{H}_2\text{P}(\text{HCOOH})_2$  in  $\text{CDCl}_3$  in aromatic region (see Figure S2 [16] for  $^1\text{H}$  NMR spectrum of formic acid).

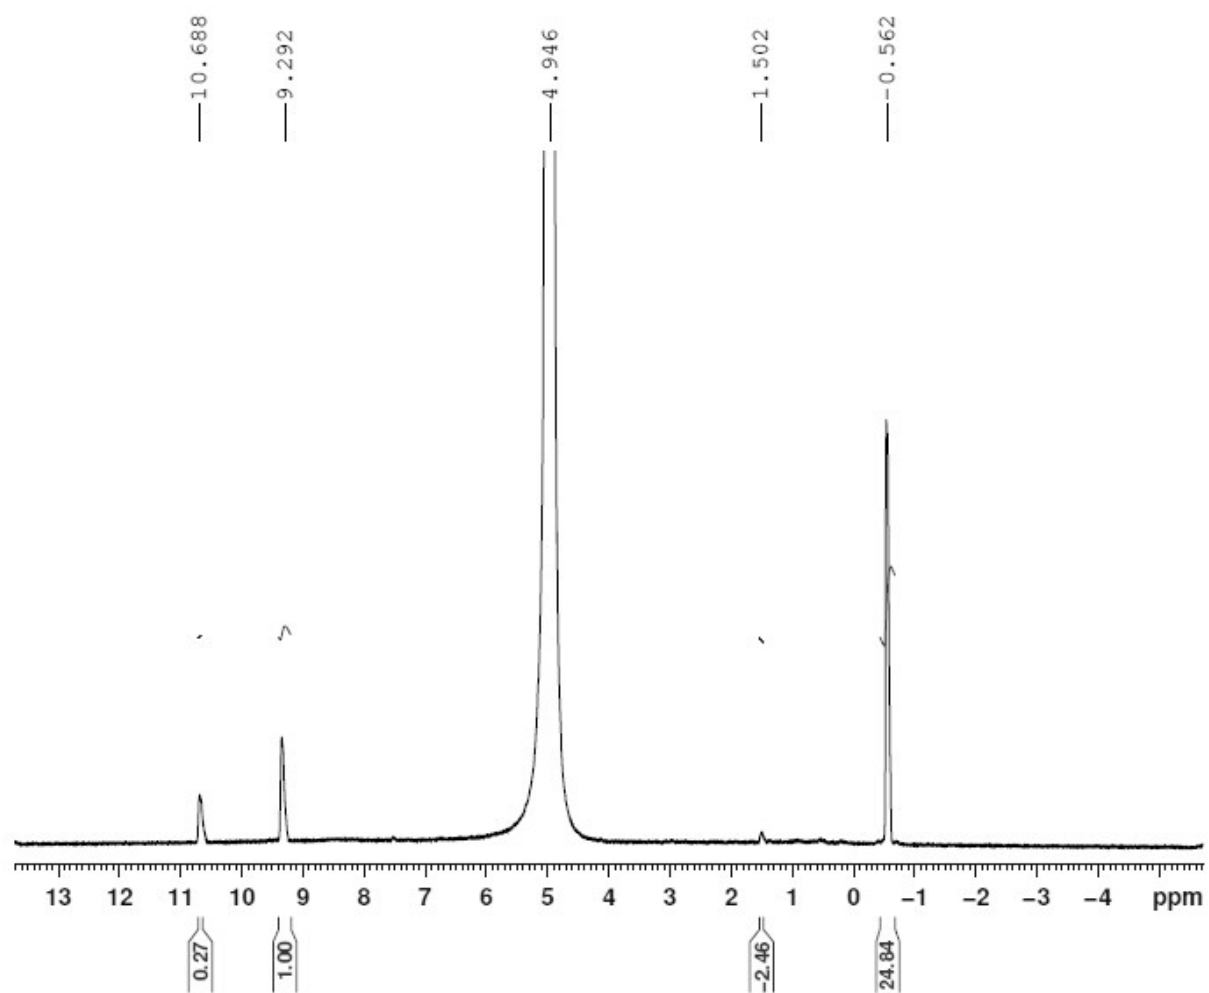

Figure S4.  $^1\text{H}$  NMR spectrum of  $\text{H}_2\text{P}(\text{CF}_3\text{COOH})_2$  in  $\text{D}_2\text{O}$ .

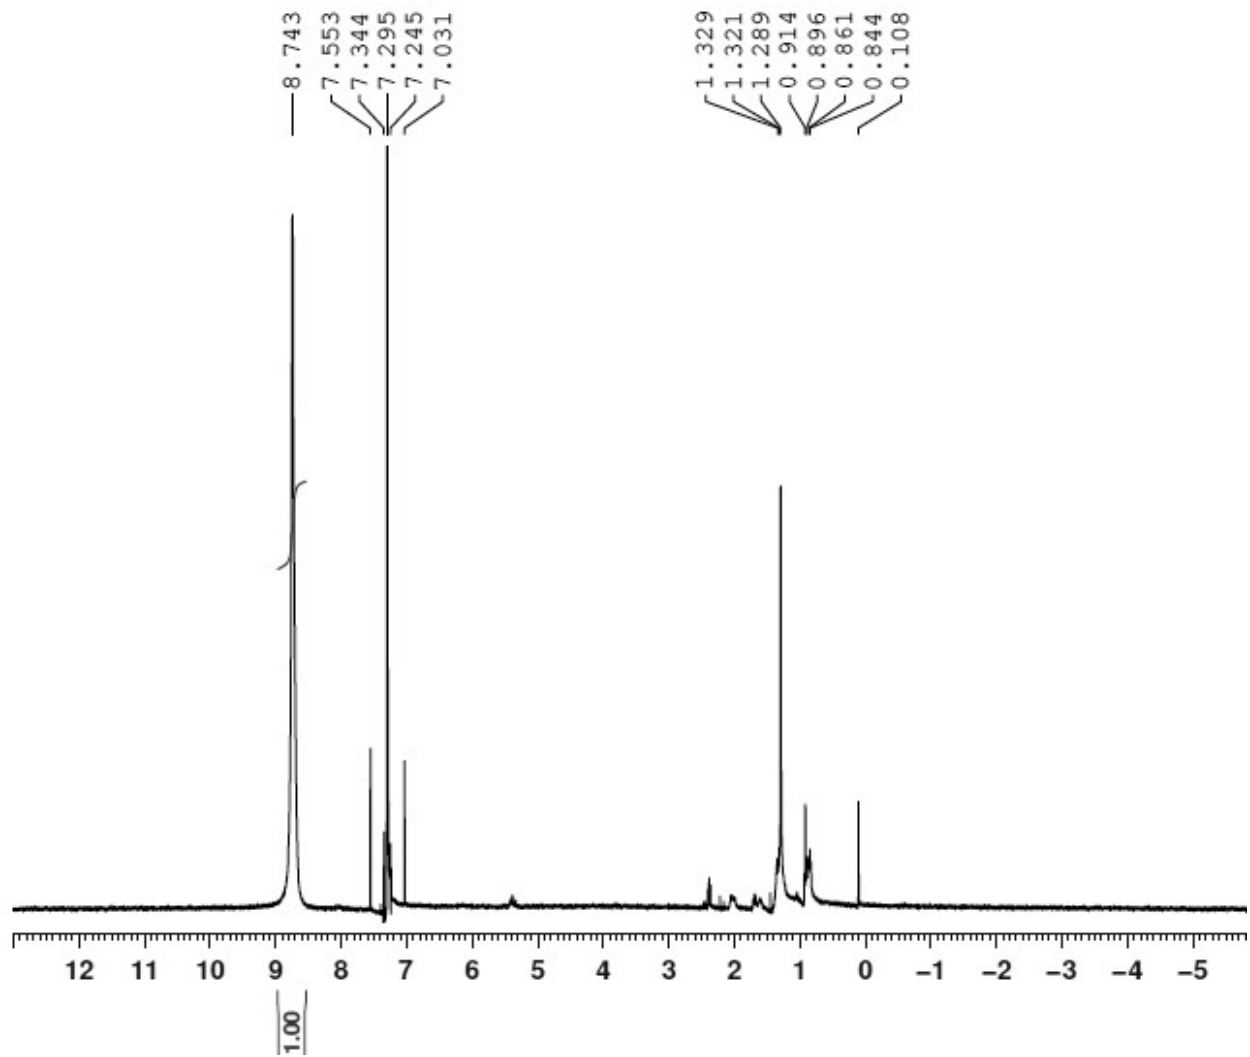

Figure S5.  $^1\text{H}$  NMR of  $\text{CF}_3\text{COOH}$  in  $\text{CDCl}_3$ .

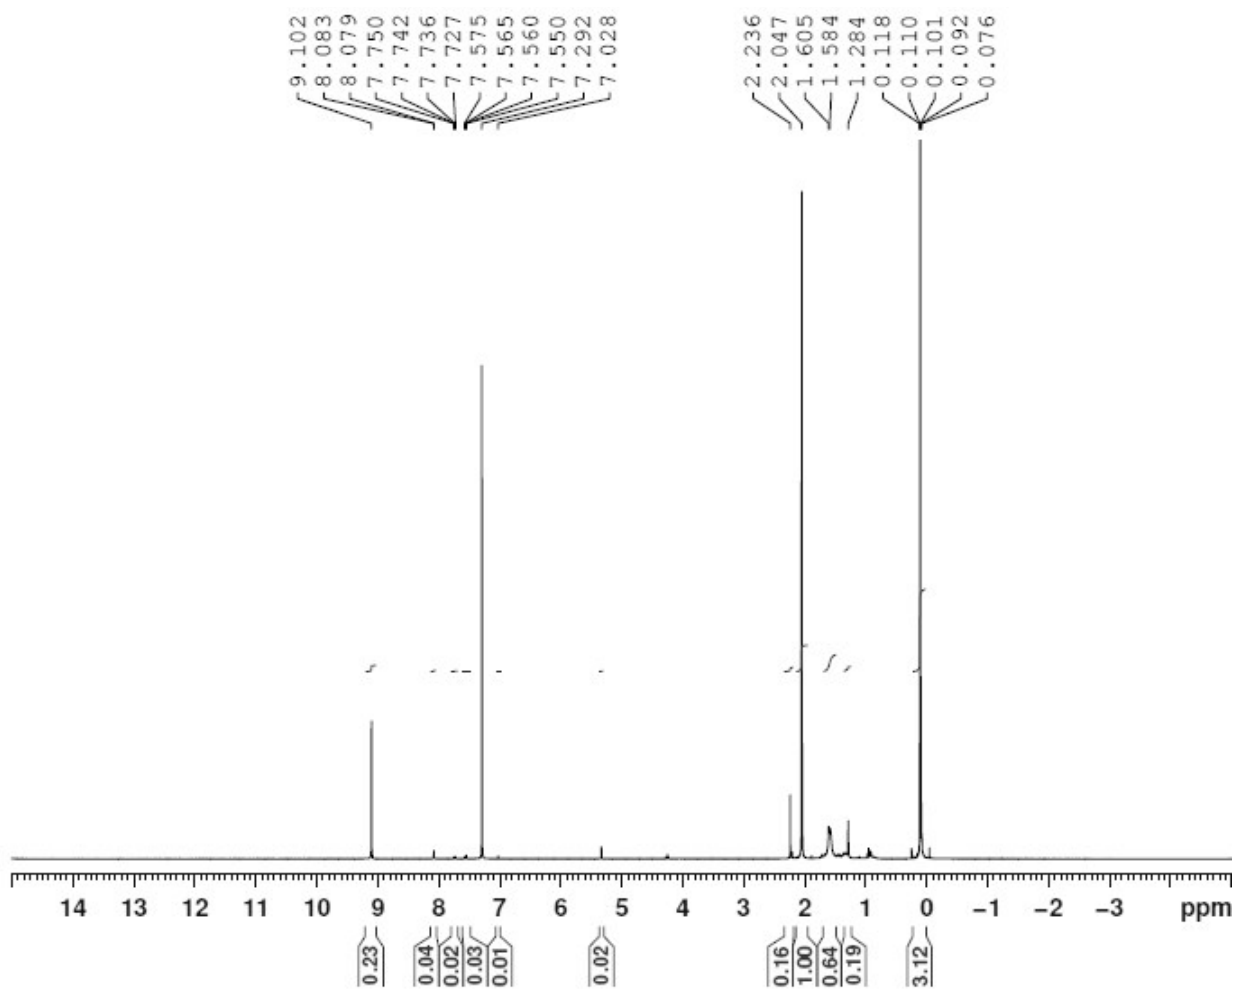

Figure S6.  $^1\text{H}$  NMR of  $\text{H}_2\text{T}(\text{tert-Bu})\text{P}$  in  $\text{CDCl}_3$ .
